## Retraction

## Retraction: Long noncoding RNA XIST is a prognostic factor in colorectal cancer and inhibits 5-fluorouracil-induced cell cytotoxicity through promoting thymidylate synthase expression

Yang Xiao<sup>1</sup>, Usenko Alexander Yurievich<sup>1</sup> and Smorzhevskiy Valentyn Yosypovych<sup>1</sup>

<sup>1</sup>Department of Surgery and Transplantology, P. L. Shupyk National Medical Academy of Postgraduate Education, Kyiv, Ukraine

Published: June 17, 2026

Copyright: © 2026 Xiao et al. This is an open access article distributed under the terms of the [Creative Commons Attribution License](#) (CC BY 4.0), which permits unrestricted use, distribution, and reproduction in any medium, provided the original author and source are credited.

**This article has been retracted:** Oncotarget has completed its investigation of this paper. The investigation found that multiple images in Figure 6B and Figure 4A were reproduced across several publications in different journals. Specifically:

- Figure 6B (HT29 cells, TS): This blot was found as Fibronectin in Figure 4E of article [1], as Bax in Figure 5C of article [2], as Bmi-1 in Figure 5D of article [3], and as Vimentin in Figure 1B of article [4].
- Figure 6B (HCT116 cells, TS): This blot was duplicated in article [5] as STAT1 (Figure 2B) and Bcl-2 (Figure 6B), and in article [6] as Bcl-2 (Figure 5C).
- Figure 6B (HCT116 cells, b-actin): This blot was reproduced as b-actin in Figure 5C of article [7] and as GAPDH in Figure 3G of article [8].
- Figure 4A: Three panels representing morphologic changes in 5FU resistant HT29 and HCT116 cells were found in Figure 1C of article [5] representing ESCC cells.

Due to these findings, the Editorial decision has been made to retract this paper. The authors were contacted multiple times to provide the explanations and original data, however, no response was received.

Original article: Oncotarget. 2017; 8:83171–83182. <https://doi.org/10.18632/oncotarget.20487>

## REFERENCES

1. Liu T, Zhang J, Chai Z, Wang G, Cui N, Zhou B. Ginkgo biloba extract EGb 761-induced upregulation of LincRNA-p21 inhibits colorectal cancer metastasis by associating with EZH2. *Oncotarget*. 2017; 8:91614–27. <https://doi.org/10.18632/oncotarget.21345>. [PubMed]. Retraction in: *Oncotarget*. 2025; 16:310. <https://doi.org/10.18632/oncotarget.28525>. [PubMed]
2. Liu H, Zhou G, Fu X, Cui H, Pu G, Xiao Y, Sun W, Dong X, Zhang L, Cao S, Li G, Wu X, Yang X. Long noncoding RNA TUG1 is a diagnostic factor in lung adenocarcinoma and suppresses apoptosis via epigenetic silencing of BAX. *Oncotarget*. 2017; 8:101899–10. <https://doi.org/10.18632/oncotarget.22058>. [PubMed]. Retraction in: *Oncotarget*. 2024; 15:90. <https://doi.org/10.18632/oncotarget.28462>. [PubMed]
3. Zhou X, Natino D, Qin Z, Wang D, Tian Z, Cai X, Wang B, He X. Identification and functional characterization of circRNA-0008717 as an oncogene in osteosarcoma through sponging miR-203. *Oncotarget*. 2017; 9:22288–300. <https://doi.org/10.18632/oncotarget.23466>. [PubMed]
4. Dong H, Wang W, Chen R, Zhang Y, Zou K, Ye M, He X, Zhang F, Han J. Exosome-mediated transfer of lncRNA-SNHG14 promotes trastuzumab chemoresistance in breast cancer. *Int J Oncol*. 2018; 53:1013–26. <https://doi.org/10.3892/ijo.2018.4467>. [PubMed]. Retraction in: *Int J Oncol*. 2022; 61:92. <https://doi.org/10.3892/ijo.2022.5382>. [PubMed]
5. Kang M, Ren M, Li Y, Fu Y, Deng M, Li C. Exosome-mediated transfer of lncRNA PART1 induces gefitinib resistance in esophageal squamous cell carcinoma via functioning as a competing endogenous RNA. *J Exp Clin Cancer Res*. 2018; 37:171. <https://doi.org/10.1186/s13046-018-0845-9>. [PubMed]. Retraction in: *J Exp Clin Cancer Res*. 2023; 42:82. <https://doi.org/10.1186/s13046-023-02648-7>. [PubMed]
6. Dai W, Mu L, Cui Y, Li Y, Chen P, Xie H, Wang X. Berberine Promotes Apoptosis of Colorectal Cancer via Regulation of the Long Non-Coding RNA (lncRNA) Cancer Susceptibility Candidate 2 (CASC2)/AU-Binding Factor 1 (AUF1)/B-Cell CLL/Lymphoma 2 (Bcl-2) Axis. *Med Sci Monit*. 2019; 25:730–38. <https://doi.org/10.12659/MSM.912082>. [PubMed]

7. Li Z, Xu W, Ren X, Xu J, Chen J. Puerarin promotes DUSP1 expression by regulating miR-133a-3p in breast cancer. *Mol Med Rep.* 2019; 19:205–12. <https://doi.org/10.3892/mmr.2018.9682>. [PubMed]
8. Huang L, Wang ZY, Pan DD. Penicillin-binding protein 1A mutation-positive *Helicobacter pylori* promotes epithelial-mesenchymal transition in gastric cancer via the suppression of microRNA-134. *Int J Oncol.* 2019; 54:916–28. <https://doi.org/10.3892/ijo.2018.4665>. [PubMed]
